# Supplementary material
Source: PubMed Central journal article supplement (PMC2646355)
Supplement: dsn030_1.pdf [file dsn030_1.pdf]

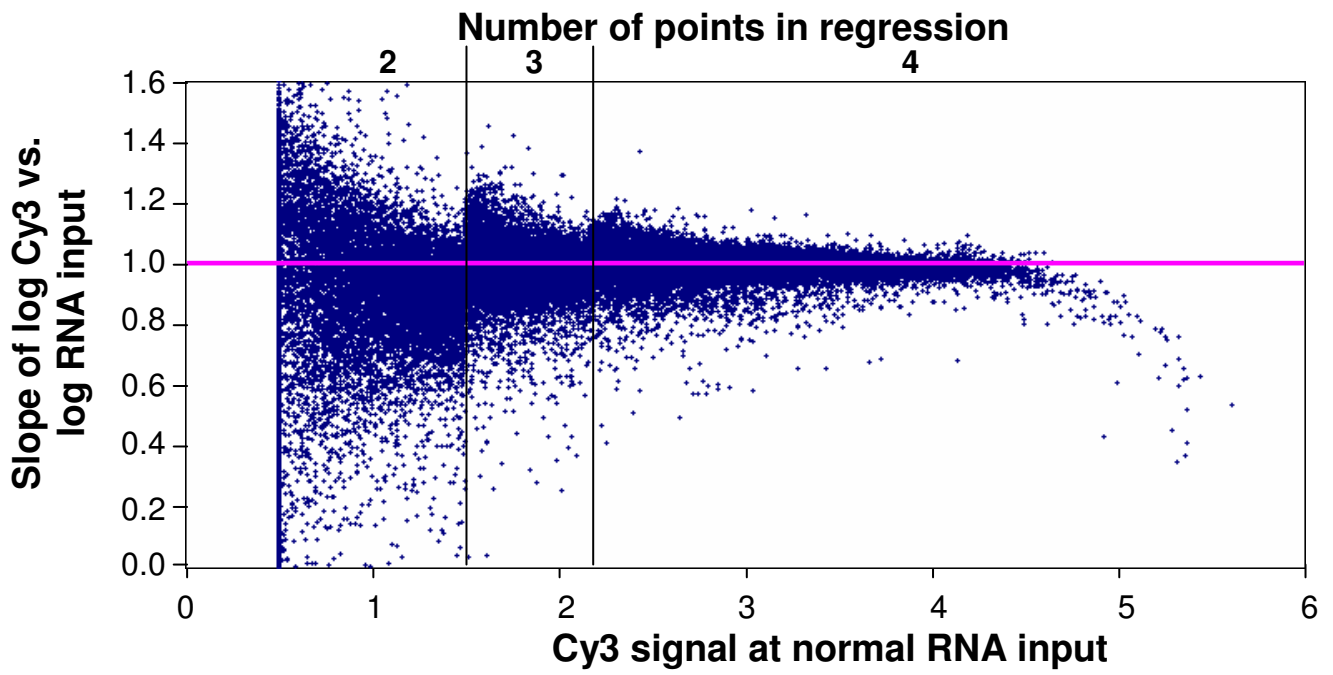

Supplementary Figure S1

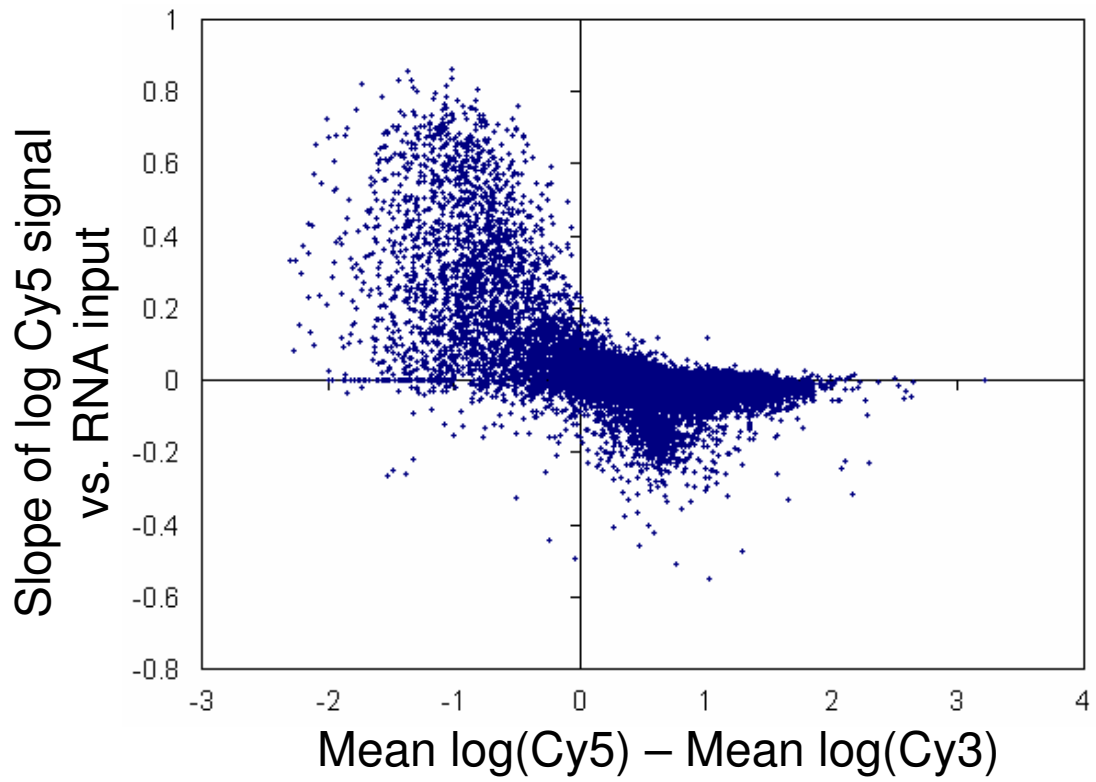

Supplementary Figure S2

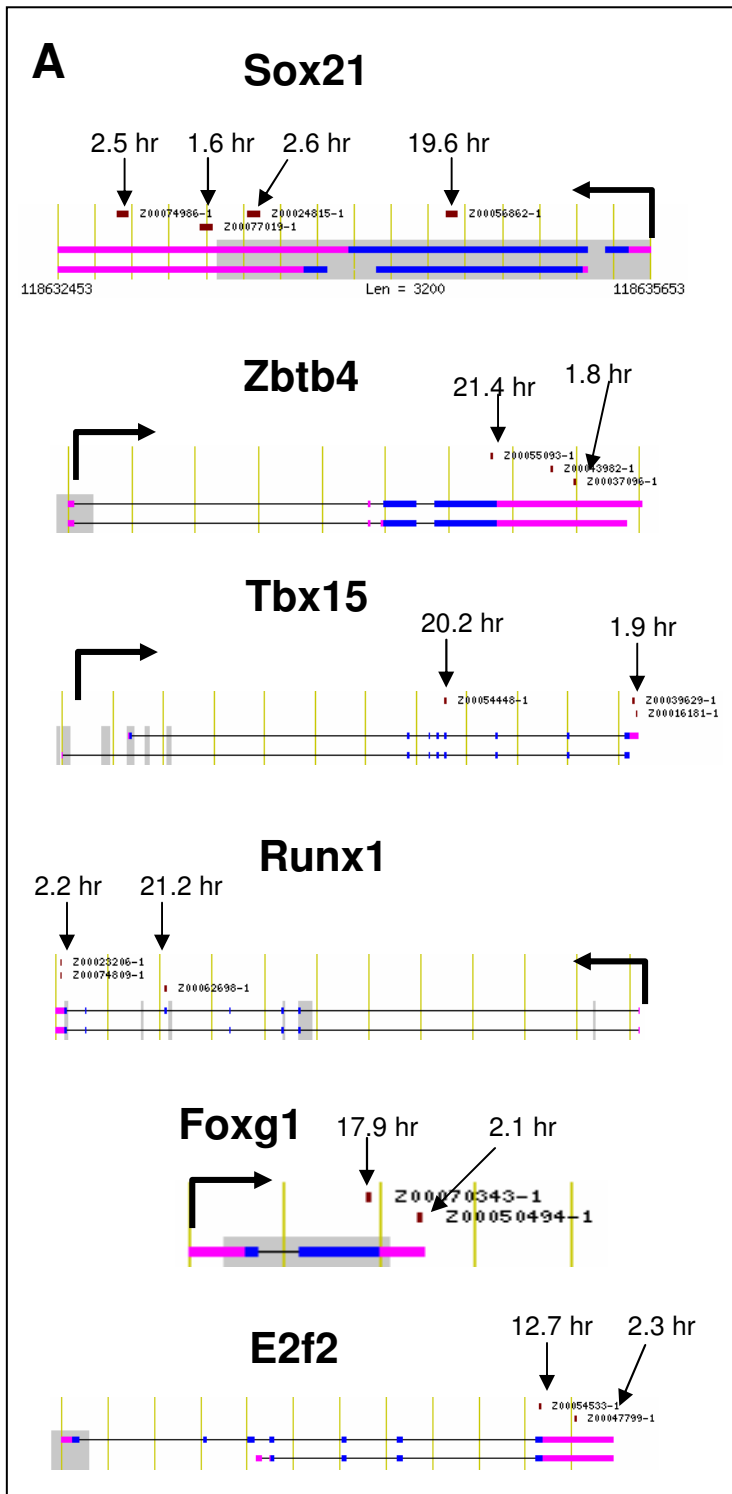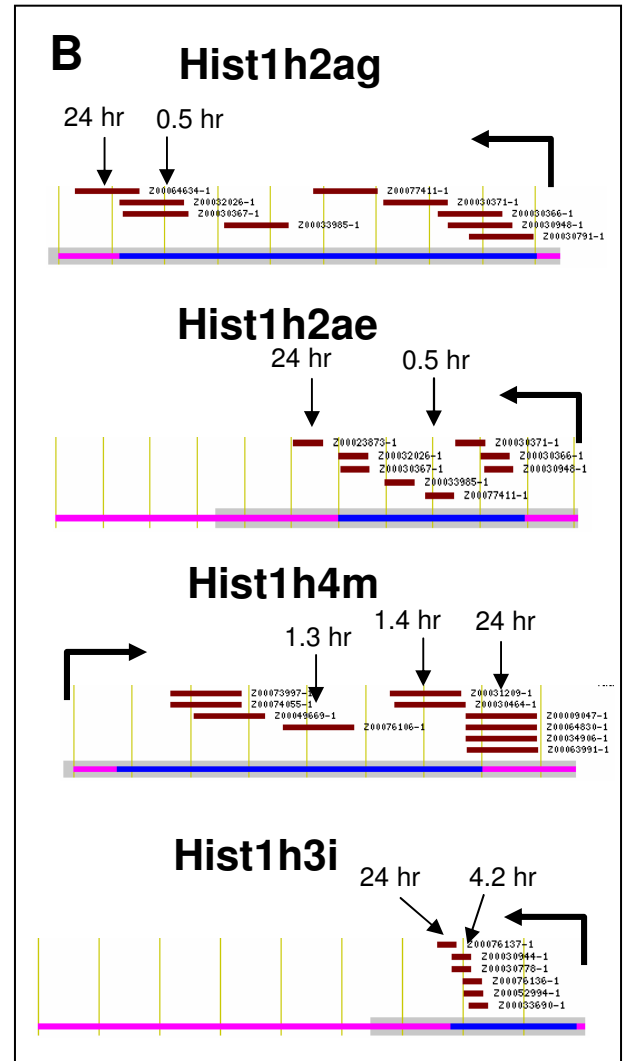

**Legend**

- ORF
- UTR
- Oligo probe
- CpG island
- mRNA half-life estimated with different probes
- ↩ Direction of transcription

Supplementary Figure S3

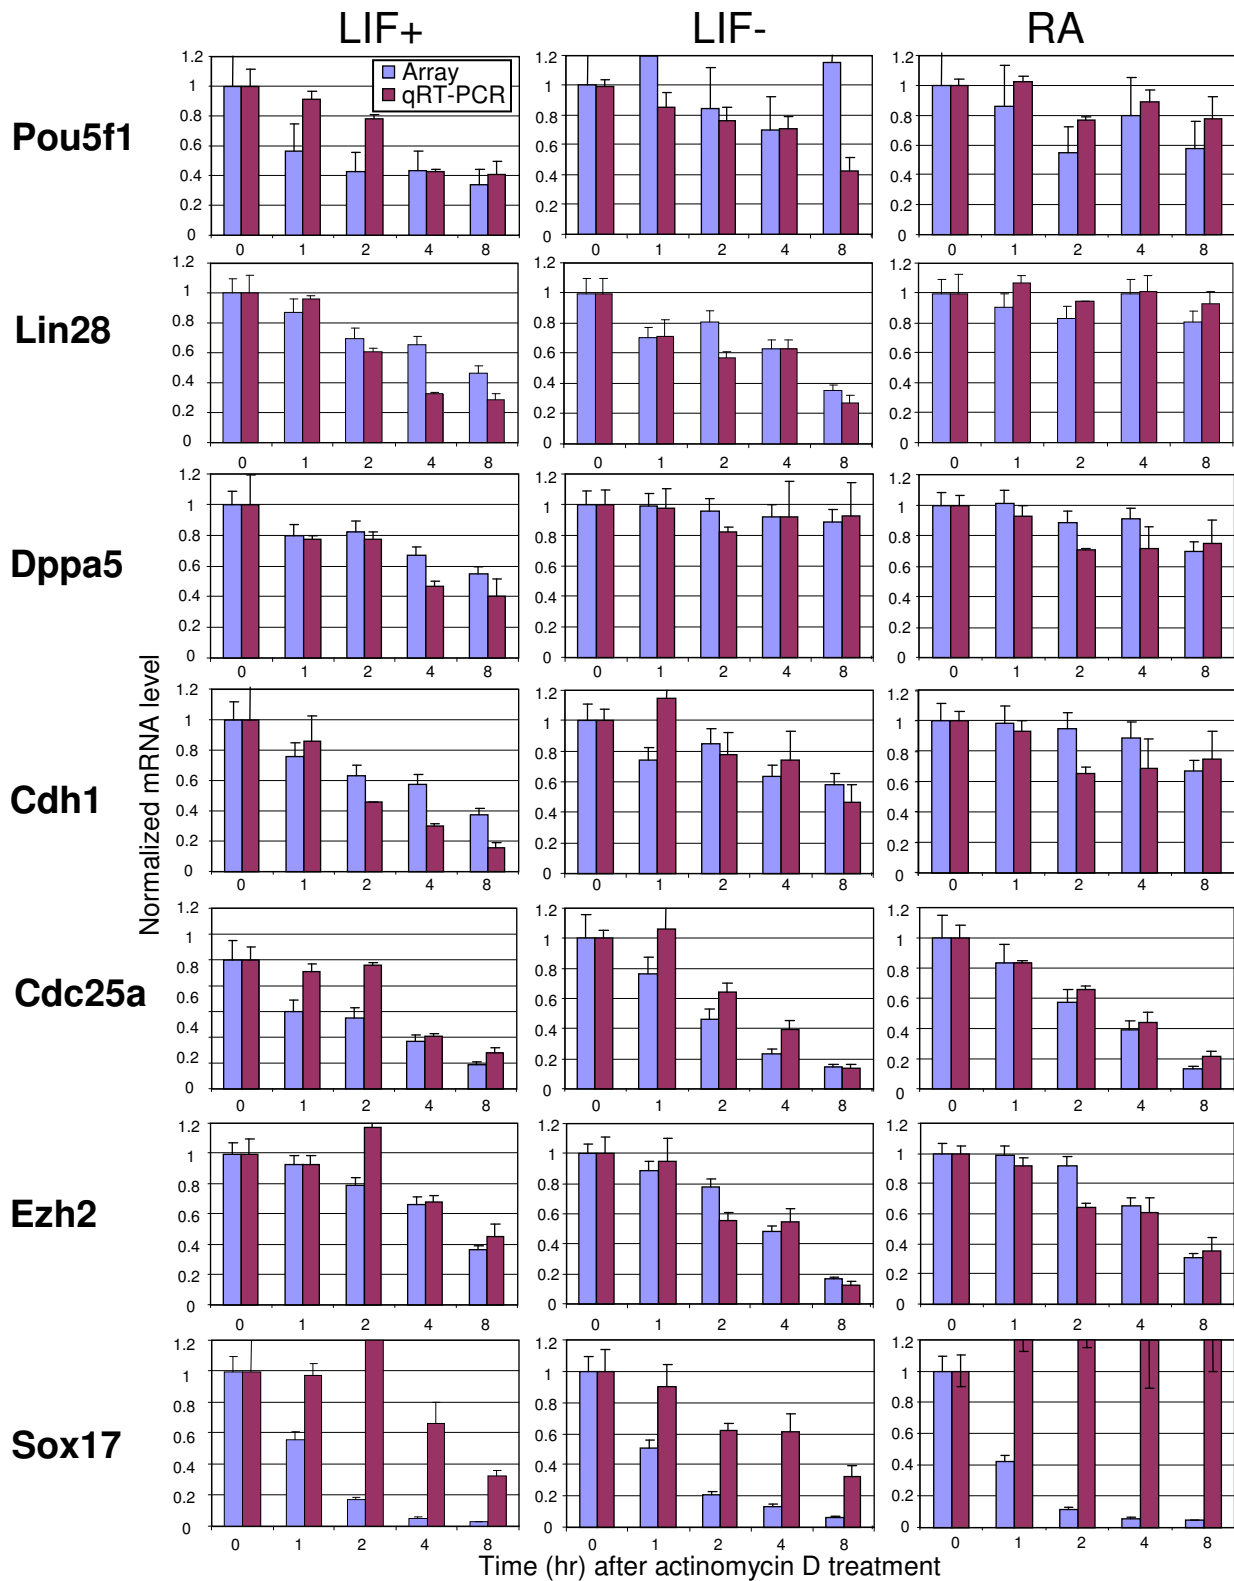

Primers:

| Gene   | Forward primer            | Reverse primer              |
|--------|---------------------------|-----------------------------|
| Pou5f1 | CCTACAGCAGATCACTCACATCGCC | CCTGTAGCCTCATACTCTTCTCGTTGG |
| Lin28  | CCAGAGCAAGCTGCACATGG      | TGGTCTAGCCCACCGCAGTT        |
| Dppa5  | GCCGTGCGTGGTGGATAAGC      | GCCAAACAGATATTTTCAGCACACAGC |
| Cdh1   | GTCAACACCTACAACGCTGCC     | CTTGGCCTCAAATCCAAGCC        |
| Cdc25a | CTACTGATGGCAAGCGTGCATTGTC | GGGTACTCATTGCCGAGCCTATCTC   |
| Ezh2   | GTGACAGAGAAGCAGGGACTG     | TACATCCTCAGTGGGAACAGG       |
| Sox17  | GGAACCTCCAGTAAGCCAGATTTGG | TGGGAAATAGGAAGGCTGAAATTC    |

Supplementary Figure S4

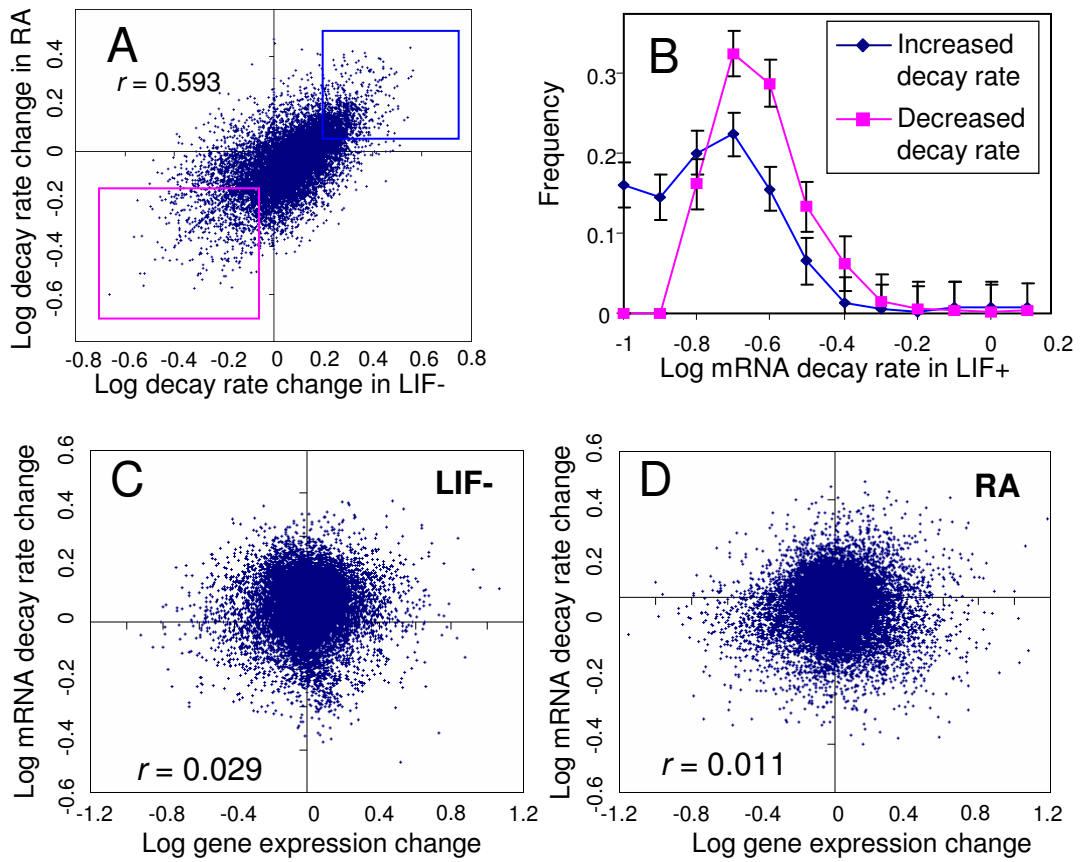

Supplementary Figure S5
